# Supplementary material
Source: publisher figshare collection journal article supplement (https://acs.figshare.com/ndownloader/files/3987991)

## Cover Image for: Thermal Response of DNA Supramolecular Polymers

### Assembled with Hydrophobic Sticky Ends

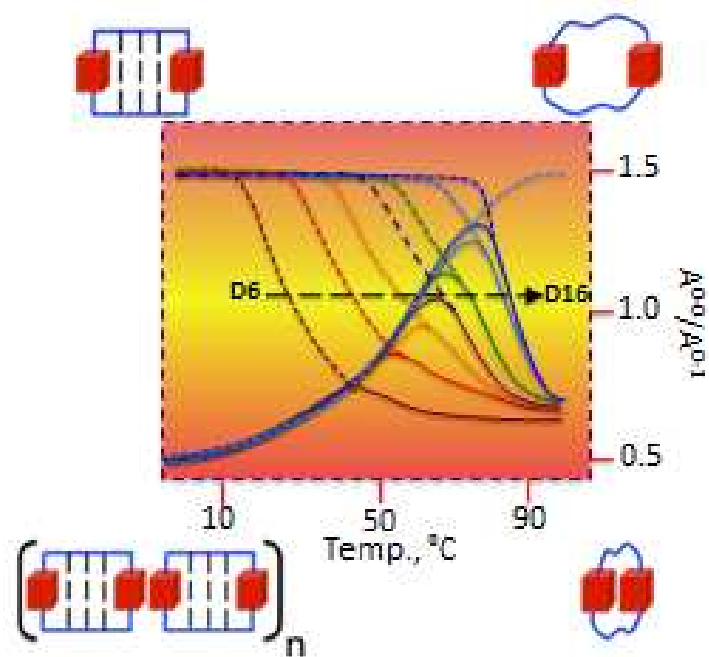

Supplement: Supplementary file 1 [file 3987991]
